RESEARCH ARTICLE

# Marker of vitamin D status in healthy children: Free or total 25-hydroxyvitamin D?

Laura Mantecón<sup>1</sup>, M<sup>a</sup> Agustina Alonso<sup>1\*</sup>, Vanessa Moya<sup>1‡</sup>, Ana Gloria Andrés<sup>2‡</sup>, Noelia Avello<sup>3‡</sup>, Eduardo Martínez-Morillo<sup>3‡</sup>, Fernando Santos<sup>1</sup>

**1** Department of Pediatrics, Hospital Universitario Central de Asturias (HUCA), Health Service of the Principality of Asturias, SESPA, Oviedo, Spain, **2** Department of Pediatrics Complejo Asistencial Universitario León, (CAULE), Health Service of Castilla-León, SACYL, León, Spain, **3** Department of Biochemistry, Hospital Universitario Central de Asturias, Health Service of the Principality of Asturias, Oviedo, Spain

☉ These authors contributed equally to this work.

‡ VM and AGA also contributed equally to this work. NA and EMM also contributed equally to this work.

\* [maruchi.al.al@gmail.com](mailto:maruchi.al.al@gmail.com)

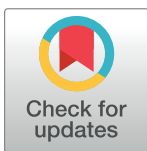

## Abstract

### Objective

To assess if serum free 25-hydroxyvitamin D (25OHD) is a better indicator of vitamin D status than total 25OHD in healthy children.

### Methods

Cross-sectional prospective clinical study was designed. We measured serum free 25OHD concentrations and its correlation with calculated free 25OHD, total 25OHD, intact parathyroid hormone (PTH), and vitamin D binding protein (DBP) in children. The influence of age, sex, ethnicity, body mass index (BMI), season of the year, diet intake, vitamin supplements, time spent outdoors and albumin concentrations on free 25OHD was also analyzed. 241 children aged from 0 days to 14 years, and living in the northern Spain (latitude 43° N), were included.

### Results

Mean (SD) free 25OHD concentrations were 2.48 (1.39), 5.46 (3.12), 4.12 (1.72), 3.82 (1.43) pg/ml in children aged 0 days, 1 month-2 years, 2–6 years and >6 years, respectively. Correlation between directly measured and calculated free 25OHD was high and significant ( $r = 0.66$ ) as well as the correlation between serum free and total 25OHD concentrations ( $r = 0.61$ ). No significant correlation was found between PTH and free 25OHD ( $r = -0.08$ ). The total 25OHD and PTH concentrations' correlation was inverse ( $r = -0.25$ ) and significant. Neither free nor total 25OHD concentrations correlated with DBP concentrations. Among the analyzed variables, free 25OHD values were higher in spring/summer than in autumn/winter in children older than 6 years.

## OPEN ACCESS

**Citation:** Mantecón L, Alonso MA, Moya V, Andrés AG, Avello N, Martínez-Morillo E, et al. (2018) Marker of vitamin D status in healthy children: Free or total 25-hydroxyvitamin D? PLoS ONE 13(8): e0202237. <https://doi.org/10.1371/journal.pone.0202237>

**Editor:** Sakamuri V. Reddy, Charles P. Darby Children's Research Institute, UNITED STATES

**Received:** June 24, 2018

**Accepted:** July 30, 2018

**Published:** August 23, 2018

**Copyright:** © 2018 Mantecón et al. This is an open access article distributed under the terms of the [Creative Commons Attribution License](https://creativecommons.org/licenses/by/4.0/), which permits unrestricted use, distribution, and reproduction in any medium, provided the original author and source are credited.

**Data Availability Statement:** All relevant data are within the paper.

**Funding:** This research study was supported by PI15/02122 (Plan Estatal I+D+I 2013-2016) grant from the Instituto de Salud Carlos III (Spain) (FS) and fondos FEDER; by GRUPIN 14-020, grant from Hospital Universitario Central de Asturias and by grant from the Foundation "Ernesto Sánchez-Villares", and the Foundation "Nutrición y Crecimiento". The funders had no role in study

design, data collection and analysis, decision to publish, or preparation of the manuscript.

**Competing interests:** The authors have declared that no competing interests exist.

## Conclusions

These findings do not support that free 25OHD is a better marker of vitamin D deficiency than total 25OHD in healthy pediatric population.

## Introduction

The status of vitamin D is clinically estimated by measuring total serum 25-hydroxyvitamin D (25OHD). Vitamin D plays a key role in the regulation of mineral metabolism [1], but in recent years a growing number of clinical studies have claimed an association between low vitamin 25OHD concentrations and increased susceptibility to certain acute and chronic diseases [2,3,4]. This potential role of vitamin D has prompted an increasing interest in detecting vitamin D deficiency.

25OHD circulates in blood mostly bound (85–90%) to its specific binding protein (DBP) and weakly to plasma albumin (10–15%), while a small fraction (<1%) constitutes its “free form” [5–7]. The bioavailable fraction is the sum of the free 25OHD and that bound to albumin [8,9]. The “free-hormone hypothesis” states that the biologic activity of hormones lies in the free or non-bound fractions to DBP [10], as it occurs with sex steroids or thyroid hormones [11,12], DBP is a protein with various genetic variations or polymorphisms that appear to modify their affinity for 25OHD and thus its free fraction [13], This might explain that similar concentrations of bioavailable 25OHD have been found in two groups of white and black people, despite lower serum levels of total 25OHD and DBP in the group of black individuals, which also had higher bone mineral density [14]. Variations in DBP concentrations and/or its different genotypes might be confusing factors on the interpretation of serum total and free 25OHD concentrations [6]. In addition, the normal values of DBP concentrations vary with age [9].

This “free-hormone hypothesis” suggests that the binding to DBP impairs the delivery of 25OHD to vitamin D-activating 1- $\alpha$ -hydroxylase in target cells, and therefore the free vitamin D fraction would better reflect the functional status of vitamin D. Thus, the reliability of assessing vitamin D status by measuring total serum 25OHD levels is questioned [15]. Free 25OHD or its bioavailable fraction was more strongly associated with bone mineral density and mineral bone parameters than the total 25OHD levels in healthy adults [16], patients with kidney diseases [17] and postmenopausal women [8]. Recent studies have reported directly measured free vitamin D in adults [18–21] or sick children [22], but there are no studies on free 25OHD and DBP levels in healthy children so far.

## Objectives

The present study was designed to determine serum free 25OHD concentrations in a healthy paediatric population living in a poorly sunlit geographical area and to analyze the correlation between serum concentrations of free 25OHD and serum total 25OHD, PTH and DBP concentrations as well as the correlation between directly measured and mathematically calculated free 25OHD concentrations. Secondary outcomes were to assess the influence of variables such as sex, age, ethnicity, BMI, season of the year, sun exposure, vitamin D supplements, diet, and albumin concentrations on free 25OHD levels.

## Material and methods

### Design, setting and subjects

A clinical, prospective, and cross-sectional study approved by the Regional Ethics Committee of the Principality of Asturias was conducted. Written informed consents were obtained from

parents. Two hundred and forty one healthy children (141 males) aged 0 to 14 years were enrolled in the study, during a period of 15 months, from December 2014 to March 2016. The study was carried out in two tertiary hospitals located in northern Spain (Asturias and Leon, latitude, 43° and 42°N, respectively).

Blood samples were obtained from umbilical cord blood at birth in newborns, whereas the samples from the rest of patients were collected during routine preoperative laboratory tests from a peripheral vein.

Infants and children chosen to participate in the study were healthy individuals who got their blood tested before programmed surgery for minor problems (adenoidectomy, inguinal hernia, hydrocele, etc. . .). Inclusion criteria were: born at term (newborns), the signing of informed consent from parents and residence in Asturias and Leon. Those children with conditions that might affect vitamin D or bone metabolism were excluded. Serum free and total 25OHD, PTH and DBP concentrations were measured as detailed below.

The following variables were collected from the mothers by telephone questionnaire survey: affiliation, sex, ethnicity, pregnancy-related diseases and vitamins or nutritional supplements during pregnancy in the group of newborns. Balanced diet intake, time spent outdoors and use of vitamin supplements were asked to the rest of the children's parents. At the time of blood extraction, body weight and height were measured and body mass index (BMI) was calculated as weight/height<sup>2</sup> (kg/m<sup>2</sup>). Overweight was defined as BMI 80th-97th percentile for age in boys and ≥85th percentile for age in girls. Obesity was defined as BMI ≥97th percentile for age and sex. BMI percentiles were determined by using age-gender-specific growth charts for the Spanish population [23].

### Laboratory measurements

Serum total 25OHD and PTH concentrations were measured by an electro-chemiluminescence assay (Roche Diagnostics Laboratory, Mannheim, Germany). For serum 25OHD, the inter-assay coefficient of variation (CV) determined with PreciControl Varia 1 and 2 ranged from 2.1 to 8.7%. For serum PTH, inter-assay CV determined with PreciControl Varia 1 and 2 ranged from 1.5 to 4%. Direct measurement of free 25OHD concentration was performed by a competitive ELISA assay (KARF1991, DiaSource, Louvain-la-Nueve, Belgium), which detects free fraction 25OH vitamin D. Intra-assay CV for controls ranged from 0.7 to 11.6%.

Levels of vitamin D binding protein (DBP) were measured by liquid chromatography (LC)-tandem mass spectrometry (MS/MS). Samples were subjected to a process of protein denaturation, trypsin digestion and purification. An isotopically labelled peptide common to the three DBP isoforms (GQELCADYSENTFTEYK) was added in order to perform relative quantification. Pretreated samples were analyzed on an expert ultra 100 (Exigent, ABSCIEX) coupled online to a triple-quadruple mass spectrometer (QTRAP 5500, ABSCIEX) using an electro-spray ionization source and selected reaction monitoring (SRM) detection mode.

Mathematical calculation of free 25OHD was carried out using the following formula [24]:

$$\text{Free vitamin D} = \frac{\text{total vitamin D}}{1 + (K_{a_{\text{alb}}} \times \text{albumin}) + (K_{a_{\text{DBP}}} \times \text{DBP})}$$

$$*K_{a_{\text{alb}}} = 5.4 \times 10^4 \text{ M}^{-1}$$

$$**K_{a_{\text{DBP}}} = 3.7 \text{ to } 4.2 \times 10^7 \text{ M}^{-1}$$

### Statistical analysis

Biochemical results are expressed as mean (SD) and p25-p75 (values for percentile 25 and 75 respectively) for each group. Comparisons between groups were carried out by t-student or Wilcoxon test for independent samples depending on the normality tests checks. For comparisons of more than three categories of a variable, Anova or Kruskal-Wallis test was used depending on the normality test checks (Shapiro-Wilks test) and homocedasticity test (Bartlett test). The correlation coefficient of Spearman was used along with its associated significance to verify the relationship between variables of continuous type. A value of  $p < 0.05$  was considered as indicative of significant differences. Statistical analysis was performed using the R Program (R Development Core Team), version 3.4.3. R: A language and environment for statistical computing. Vienna, Austria. (ISBN 3-900051-07-0).

### Results

A total of 241 children (60% males) were enrolled into the study. Five cases were excluded as a result of insufficient blood sample. Characteristics of the participants are shown in Table 1.

Free and total 25OHD, PTH and albumin concentrations differed significantly among all groups of age ( $p < 0.001$ ). Infants aged 0–2 years commonly recommended to take vitamin D prophylaxis in our community from birth to 12–18 months had higher concentrations of free and total 25OHD levels ( $p < 0.001$ ). However, newborns from mothers receiving nutritional supplements containing vitamin D during the gestation did not have significantly higher free 25OHD concentrations.

DPB concentrations were measured in 70 children and significant differences by age were found, being lower in the neonates' group ( $p < 0.02$ ) (Table 2). Sex and BMI did not influence on DBP concentrations ( $p = 0.69$  and  $0.53$ , respectively). Correlation between directly measured and calculated 25OHD was high and statistically significant ( $r = 0.66$ ,  $p < 0.001$ )

For the whole sample, there was as well a high and significant correlation between serum free and total 25OHD levels ( $r = 0.61$ ,  $p < 0.001$ ) (Fig 1).

**Table 1. Characteristics of the children.**

| Global n* = 236                   | n* (%)     |
|-----------------------------------|------------|
| <b>Sex</b>                        |            |
| Boys                              | 141 (59.7) |
| Girls                             | 95 (40.3)  |
| <b>Age Group</b>                  |            |
| Neonates                          | 47 (19.9)  |
| 0–2 years                         | 33 (14)    |
| 2–6 years                         | 79 (33.5)  |
| >6 years                          | 77 (32.6)  |
| <b>Ethnicity (n = 192)^</b>       |            |
| Caucasian                         | 170 (88.5) |
| Other                             | 22 (11.4)  |
| <b>Body Mass Index (n = 214)^</b> |            |
| Obesity                           | 12 (5.6)   |
| Overweight                        | 23 (10.7)  |
| Normal weight                     | 179 (83.6) |

\* n = sample size

^ This information could not be collected in 100% of the sample.

<https://doi.org/10.1371/journal.pone.0202237.t001>

**Table 2. Laboratory findings in serum of children grouped by age.**

|                             | Mean±SD       | Median | Percentile 25 | Percentile 75 |
|-----------------------------|---------------|--------|---------------|---------------|
| <b>Total 25OHD* (ng/mL)</b> |               |        |               |               |
| Newborns                    | 19.99 ± 10.64 | 18.87  | 11.70         | 24.38         |
| 0–2 years                   | 43.87 ± 12.32 | 43.77  | 37.20         | 51.56         |
| 2–6 years                   | 28.89 ± 9.70  | 29.60  | 22.75         | 33.55         |
| >6 years                    | 23.03 ± 8.21  | 21.08  | 17.52         | 28.66         |
| <b>Free 25OHD* (pg/mL)</b>  |               |        |               |               |
| Newborns                    | 2.48 ± 1.39   | 2.26   | 1.68          | 2.95          |
| 0–2 years                   | 5.46 ± 3.12   | 5.36   | 3.01          | 7.22          |
| 2–6 years                   | 4.12 ± 1.72   | 4.28   | 2.92          | 5.44          |
| >6 years                    | 3.82 ± 1.43   | 3.54   | 2.78          | 4.94          |
| <b>PTH* (pg/mL)</b>         |               |        |               |               |
| Newborns                    | 20.30 ± 22.62 | 5.75   | 3.57          | 36.89         |
| 0–2 years                   | 20.04 ± 10.32 | 15.26  | 12.44         | 27.27         |
| 2–6 years                   | 25.44 ± 10.64 | 25.00  | 18.05         | 31.12         |
| >6 years                    | 31.94 ± 11.63 | 30.00  | 24.41         | 36.82         |
| <b>DBP‡ (nmol/mL)</b>       |               |        |               |               |
| Newborns                    | 28.00 ± 3.90  | 28.25  | 26.57         | 30.01         |
| 0–2 years                   | 35.77 ± 7.93  | 33.47  | 31.42         | 39.49         |
| 2–6 years                   | 37.95 ± 4.78  | 37.95  | 34.03         | 41.38         |
| >6 years                    | 35.57 ± 5.38  | 35.61  | 32.22         | 38.45         |
| <b>Albumin* (g/dL)</b>      |               |        |               |               |
| Newborns                    | 39.30 ± 3.50  | 40.10  | 37.40         | 41.20         |
| 0–2 years                   | 43.44 ± 8.35  | 44.45  | 42.33         | 47.55         |
| 2–6 years                   | 46.14 ± 2.33  | 46.60  | 44.98         | 47.90         |
| >6 years                    | 46.95 ± 2.85  | 46.60  | 45.20         | 48.40         |

**25OHD:** 25 hydroxyvitamin D. **PTH:** Parathyroid hormone. **DBP:** Vitamin D binding protein

\*Significant differences detected among all groups of age (p Value < 0.001)

‡Significant differences detected among neonates group and the other groups of age (p Value < 0.05)

<https://doi.org/10.1371/journal.pone.0202237.t002>

The correlation between measured and calculated serum free 25OHD and PTH concentrations was not significant, but it was significant between serum 25OHD total and PTH concentrations (Fig 2).

Neither free nor total 25OHD concentrations were correlated with DBP levels (Figs 3 and 4).

The correlation coefficients between variables are shown in Table 3. Comparisons between groups demonstrated no effect of sex, ethnicity, BMI, diet, and sun exposure on free 25OHD levels (p>0.05). No differences were found between season of the year and free 25OHD values when the whole sample was analyzed globally (p = 0.26) However, the group of children older than 6 years had higher values (p = 0.003) in spring/summer than in autumn/winter. This significant elevation of free vitamin D did not correlate with a decrease in PTH.

## Discussion

This study provides reference values of free serum 25OHD concentrations in a relatively large group of healthy children, mostly Caucasian, aged from birth to 14 years living in a region at northern latitude. To our knowledge, former data on values of free 25OHD in healthy paediatric population have not been published. Importantly, the study also shows a high correlation

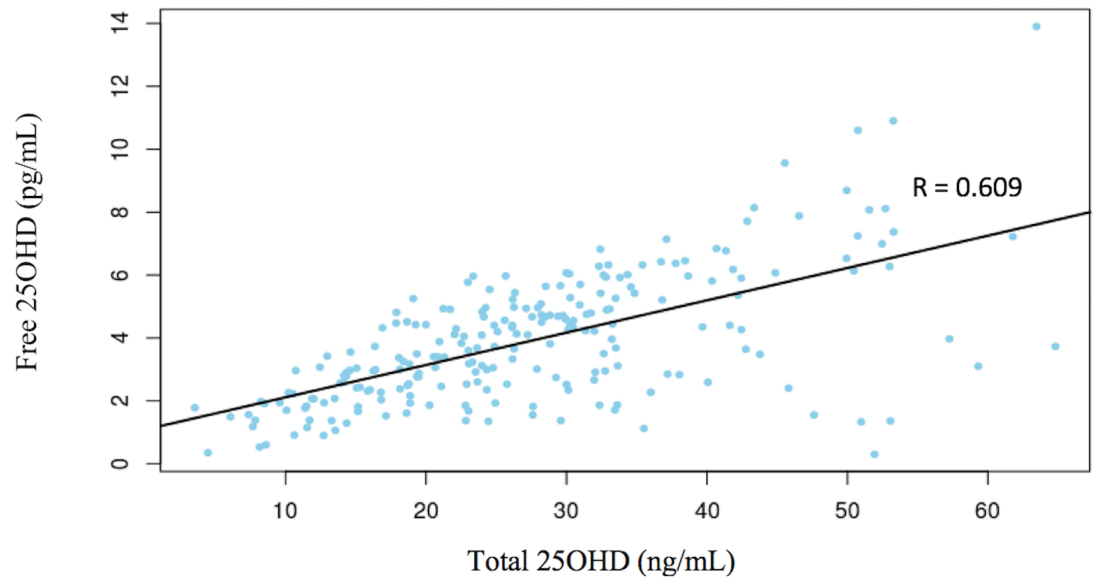

**Fig 1. Significant ( $p < 0.001$ ) positive correlation between serum free and total 25OHD concentrations.**

<https://doi.org/10.1371/journal.pone.0202237.g001>

between free and total serum 25OHD concentrations. Infants aged 0–2 years had higher free and total 25OHD concentrations, likely resulting from oral vitamin D prophylaxis in this age’s group. The same result has been found in patients with cystic fibrosis that were receiving vitamin D supplements [22]. Thus, chronic supplementation with oral vitamin D increases free and total serum 25OHD concentrations in parallel [25].

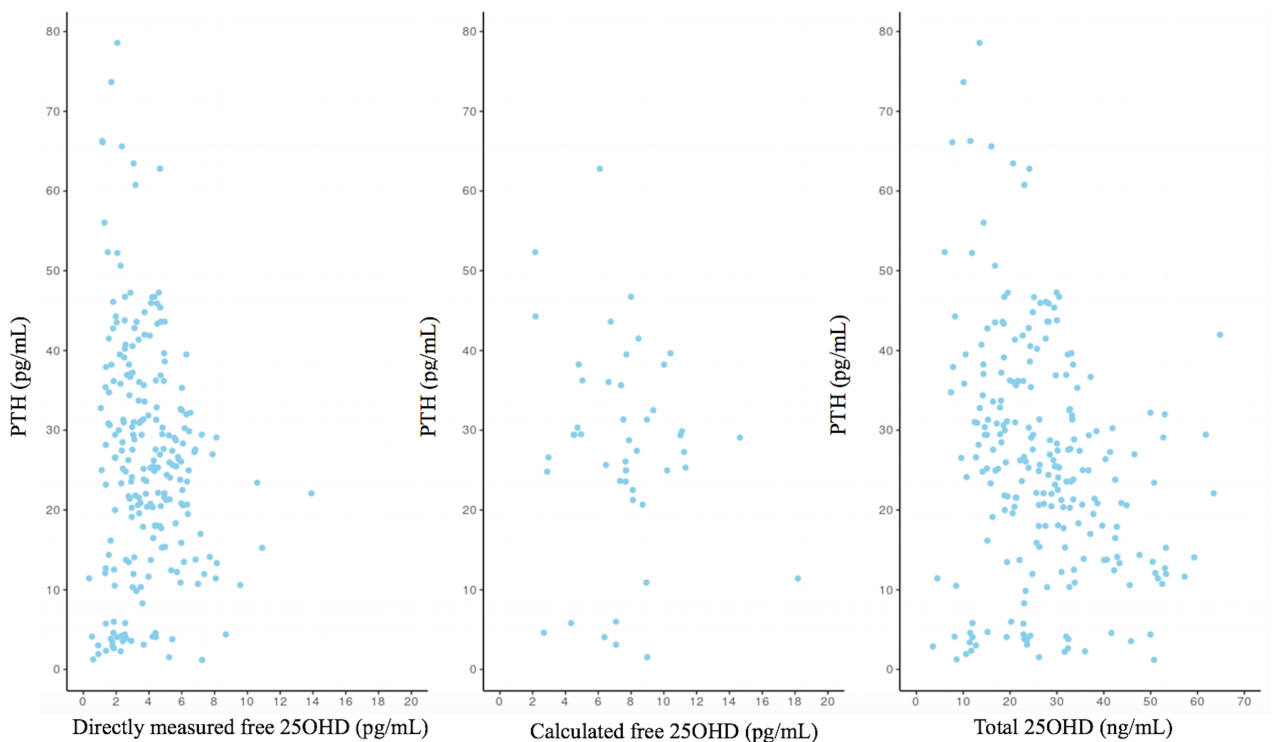

**Fig 2. The correlation between the three different 25OHD values and PTH concentrations.**

<https://doi.org/10.1371/journal.pone.0202237.g002>

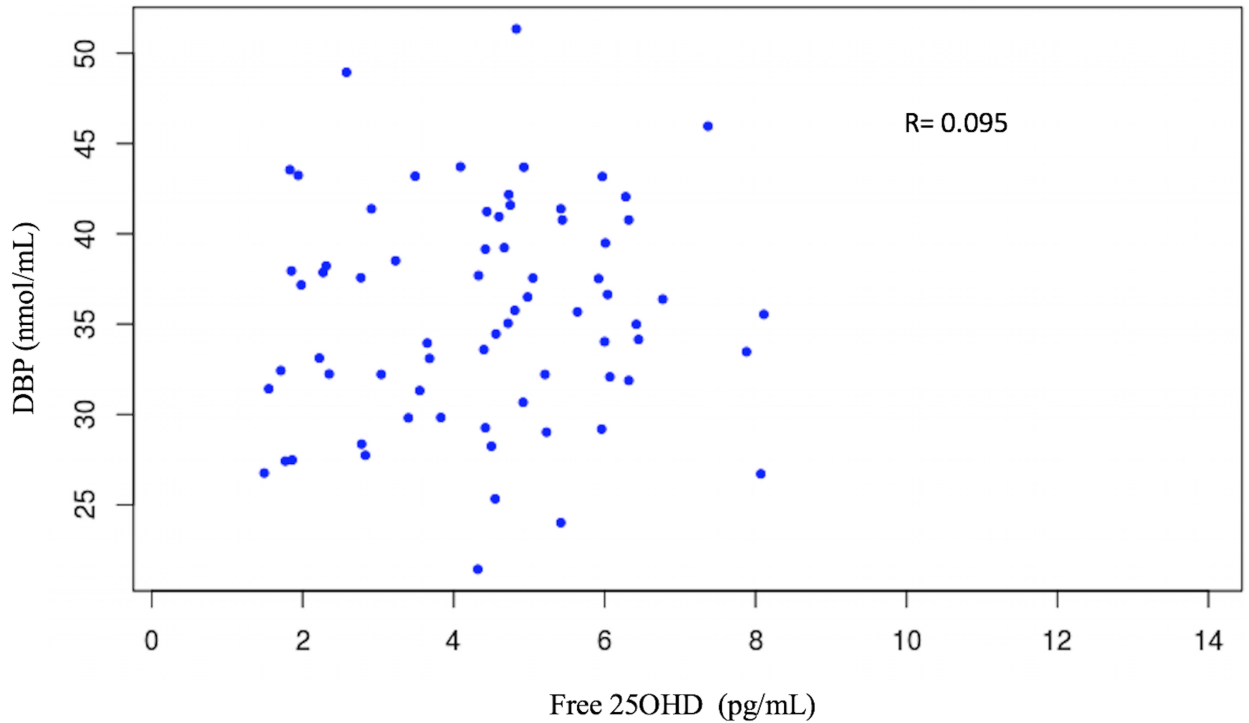

Fig 3. No significant correlation between serum free 25OHD and DBP concentrations.

<https://doi.org/10.1371/journal.pone.0202237.g003>

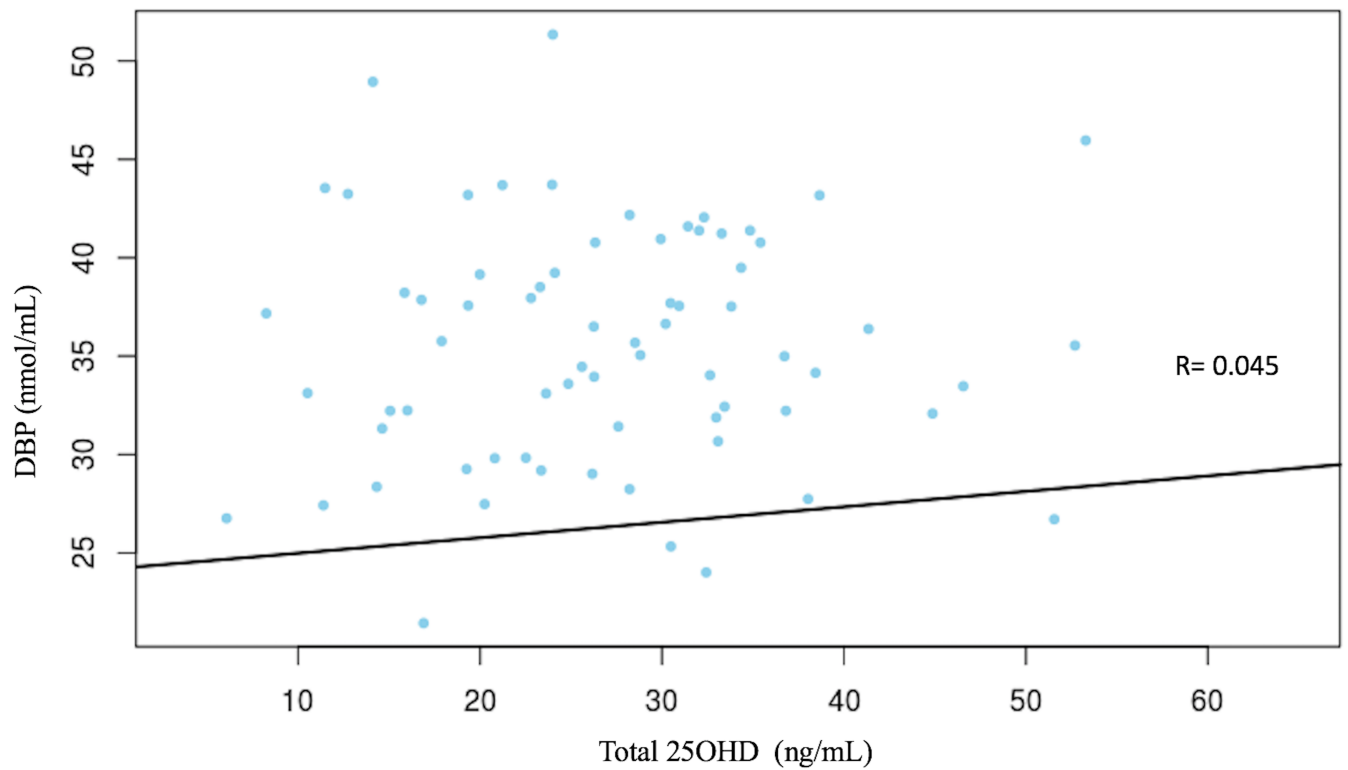

Fig 4. No significant correlation between serum total 25OHD and DBP concentrations.

<https://doi.org/10.1371/journal.pone.0202237.g004>

**Table 3. Correlations between variables in serum.**

|                                   | Correlation | p Value |
|-----------------------------------|-------------|---------|
| Free 25OHD*/Total 25 OHD          | 0.609       | <0.001  |
| Free 25OHD/PTH                    | -0.079      | 0.234   |
| Free 25OHD/DBP                    | 0.095       | 0.435   |
| Free 25OHD/ Albumin               | 0.141       | 0.058   |
| Total 25OHD/PTH                   | -0.253      | <0.001  |
| Total 25OHD/DBP                   | 0.045       | 0.709   |
| Total 25OHD/Albumin               | 0.116       | 0.115   |
| Free 25OHD /Calculated free 25OHD | 0.657       | <0.001  |
| Free 25OHD calculated/PTH         | 0.104       | 0.489   |

\*Free 25OHD = measured free 25OHD

<https://doi.org/10.1371/journal.pone.0202237.t003>

The study also shows that serum free 25OHD and PTH concentrations are not significantly correlated whereas the relation between total 25OHD and PTH is inverse and significant, although weak. In 2005, Hollis et al. showed a clear inverse correlation between total 25OHD and PTH levels in adults, describing a clear plateau effect and a concentration from which on the decrease of 25OHD is associated with a rapid rise in PTH levels. This value, corresponding to a serum 25OHD level of 20 ng/ml, was subsequently defined as the deficiency threshold [26]. Although controversial, this value was also admitted in paediatric population [25]. However, studies carried out in infants and children did not confirm this cut-off point and it has not been demonstrated the appropriateness of this concentration, below 20 ng/ml, to define vitamin D deficiency in paediatric age [27,28]. Several organizations and societies have strived to developed guidelines for recommended desirable 25OHD levels, but their applicability across age is still debated. The American Society for Bone and Mineral Research proposes a desirable range of 25OHD concentrations of 20 to 40 ng/mL, whereas lower levels, 15 to 20 ng/mL, may be sufficient for infants and adults, and higher levels, 40 to 60 ng/mL, may still be safe [29]. Regardless of this limitation, as change of circulating PTH levels is considered to be one of the most sensitive biomarkers of vitamin D activity in vivo, the findings of our study indicate that the measurement of free vitamin D is not preferable to total 25OHD determination in the clinical estimate of vitamin D status in healthy children at any age.

Until few years ago, free 25OHD serum concentrations were usually calculated by means of a complex mathematical formula including total 25OHD and albumin values [4,11]. Recently, an assay to directly measure free vitamin D in serum samples has been developed and it is now available in the market (Future Diagnostics BV). Some studies have compared both methods of assessment, concluding that the direct measurement of free vitamin D is more accurate than that calculated [21,24]. The arising of the “free hormone” hypothesis [15] giving a predominant role to the unbound circulating 25OHD in the regulation of vitamin D bioactivity and the interest for the diagnosis of subclinical status of vitamin D deficiency, as mentioned above, might prompt the extended measurement of free 25OHD concentrations in serum, a technique with limitations such as the lack of a reference method and the low concentrations of free vitamin D detected [30]. It is of note that some children had high values of total but not free vitamin D (Fig 1) which can likely be explained by the cross reactivity with the 3-epi-25OHD.

Our results do not support that the determination of free 25OHD is more reliable than the measurement of total 25OHD as marker of vitamin D status in healthy paediatric population.



Relative to DBP levels, we found no significant relationship between free 25OHD and DBP concentrations. Powe et al. [14] reported that DBP concentrations were lower in African Americans than in whites and as a result, calculated bioavailable 25OHD concentrations derived from those DBP measures were similar in both populations concluding that low total 25OHD does not necessarily indicate low bioavailable form of vitamin D. However, other publications did not report differences in DBP, and issues have been raised concerning the DBP measurements used by Powe et al [31–33]. In addition to the absolute value of DBP concentrations, the DBP genotype might have different binding affinity for specific vitamin D metabolites and exert a significant effect on the concentrations of serum free 25OHD [34]. It has been suggested that the measurement of free 25OHD in serum may help to evaluate vitamin D status in protein deficient adults with liver insufficiency or malnutrition [8,16,17]. In these patients having low concentrations of carrier proteins (DBP or albumin), the free fraction of vitamin D was more strongly associated with mineral bone parameters than the total 25OHD. Our study, carried out in healthy children, did not address this issue. In preterm infants whose serum protein and albumin concentrations are usually low, free 25OHD concentrations did not significantly correlate with DBP levels and, as occurred in our study, highly correlated with total 25OHD concentrations [35].

Factors known to influence serum concentrations of total 25OHD, such as skin pigmentation, sun exposure, unbalanced dietary intake [36–39], were not significantly associated with free 25OHD concentrations in our study. Likewise, no association was found between BMI values and free 25OHD levels. No uniform results have been reported in publications analyzing the relationship between BMI and total 25OHD concentrations in paediatric population [40,41]. As expected and commented above, the sustained administration of vitamin D supplements increased the circulating concentrations of free and total 25OHD. This variable and the season of the year were the only environmental factors found to have a significant influence on the serum concentrations of free 25OHD in our sample of children including a large range of ages. Several studies report strong seasonal variation in 25OHD and PTH levels, and even a seasonal, inverse relationship between this parameter, recommending that the month of testing for vitamin D and PTH should be considered [42].

It should be kept in mind that the use of a questionnaire to get information on the other environmental variables is a methodological limitation of our study and attenuates the validity of the results. It is also of note that the sample of children was mostly composed of Caucasian individuals and the results cannot be directly extrapolated to populations having more racial variations.

## Conclusions

In summary, this study provides novel information on the values of free 25OHD serum concentrations in infants and children. The study indicates that, although the clinical application of free 25OHD measurement still needs to be established, the high correlation found between free and total 25OHD serum concentrations and the absence of significant correlation between free 25OHD and PTH levels suggest that the measurement of free 25OHD in serum does not represent any benefit on that of total 25OHD as marker of vitamin deficiency in healthy paediatric population.

## Acknowledgments

The authors are grateful to the infants and their families for their participation in the study, to Tania Iglesias, from the Statistical Consultancy Unit of the University of Oviedo, and Julian

Rodriguez for the statistical analysis of the data. In memoriam of Dr. Luis Miguel Rodriguez who played a crucial role in the preliminary phases of the study.

## Author Contributions

**Conceptualization:** Laura Mantecón, M<sup>a</sup> Agustina Alonso, Fernando Santos.

**Data curation:** Laura Mantecón, Vanessa Moya, Ana Gloria Andrés, Noelia Avello, Eduardo Martínez-Morillo.

**Formal analysis:** Laura Mantecón, M<sup>a</sup> Agustina Alonso, Noelia Avello, Eduardo Martínez-Morillo, Fernando Santos.

**Funding acquisition:** M<sup>a</sup> Agustina Alonso, Fernando Santos.

**Investigation:** Laura Mantecón, M<sup>a</sup> Agustina Alonso, Vanessa Moya, Ana Gloria Andrés, Noelia Avello, Eduardo Martínez-Morillo, Fernando Santos.

**Methodology:** Laura Mantecón, M<sup>a</sup> Agustina Alonso, Fernando Santos.

**Project administration:** Fernando Santos.

**Resources:** Fernando Santos.

**Software:** Fernando Santos.

**Supervision:** M<sup>a</sup> Agustina Alonso, Fernando Santos.

**Validation:** M<sup>a</sup> Agustina Alonso, Fernando Santos.

**Visualization:** Fernando Santos.

**Writing – original draft:** Laura Mantecón, M<sup>a</sup> Agustina Alonso, Eduardo Martínez-Morillo, Fernando Santos.

**Writing – review & editing:** M<sup>a</sup> Agustina Alonso, Fernando Santos.

## References

1. Holick MF. Vitamin D deficiency. *N Engl J Med*. 2007; 357: 266–281. <https://doi.org/10.1056/NEJMra070553> PMID: 17634462
2. Shaw NJ, Mughal MZ. Vitamin D and child health: part 2 (extraskelatal and other aspects). *Arch Dis Child*. 2013; 98:368–372. <https://doi.org/10.1136/archdischild-2012-302585> PMID: 23493188
3. Onwuneme C, Martin F, McCarthy R, Carroll A, Segurado R, Murphy J, et al. The Association of Vitamin D Status with Acute Respiratory Morbidity in Preterm Infants. *J Pediatr*. 2015; 166:1175–1180. <https://doi.org/10.1016/j.jpeds.2015.01.055> PMID: 25919726
4. Wacker M, Holick MF. Vitamin D—effects on skeletal and extraskelatal health and the need for supplementation. *Nutrients*. 2013; 5:111–148. <https://doi.org/10.3390/nu5010111> PMID: 23306192
5. Bikle DD, Gee E, Halloran B, Kowalski MA, Ryzan E, Haddad JG. Assessment of the free fraction of 25-hydroxyvitamin D in serum and its regulation by albumin and the vitamin D-binding protein. *J Clin Endocrinol Metab*. 1986; 63:954–959. <https://doi.org/10.1210/jcem-63-4-954> PMID: 3745408
6. Yousefzadeh P, Shapses SA, Wang X. Vitamin D Binding Protein Impact on 25-Hydroxyvitamin D Levels under Different Physiologic and Pathologic Conditions. *Int J Endocrinol*. 2014; 2014:981581. <https://doi.org/10.1155/2014/981581> PMID: 24868205
7. Bouillon R, Van Assche FA, Van Baelen H, Heyns W, De Moor P. Influence of the vitamin D-binding protein on the serum concentration of 1,25-dihydroxyvitamin D3. Significance of the free 1,25-dihydroxyvitamin D3 concentration. *J Clin Invest*. 1981; 67:589–596. <https://doi.org/10.1172/JCI110072> PMID: 6894152
8. Johnsen MS, Grimnes G, Figenschau Y, Torjesen PA, Almås B, Jorde R. Serum free and bio-available 25-hydroxyvitamin D correlate better with bone density than serum total 25-hydroxyvitamin D. *Scand J Clin Lab Invest*. 2014; 74:177–183. <https://doi.org/10.3109/00365513.2013.869701> PMID: 24383929

9. Cooke NE, Haddad JG. Vitamin D binding protein (Gc-globulin). *Endocr Rev.* 1989; 10:294–307. <https://doi.org/10.1210/edrv-10-3-294> PMID: 2476303
10. Mendel CM. The free hormone hypothesis: a physiologically based mathematical model. *Endocr Rev.* 1989; 10:232–274. <https://doi.org/10.1210/edrv-10-3-232> PMID: 2673754
11. Mendel CM. The free hormone hypothesis. Distinction from the free hormone transport hypothesis. *J Androl.* 1992; 13:107–116. PMID: 1597394
12. Vermeulen A, Verdonck L, Kaufman JM. A critical evaluation of simple methods for the estimation of free testosterone in serum. *J Clin Endocrinol Metab.* 1999; 84:3666–3672. <https://doi.org/10.1210/jcem.84.10.6079> PMID: 10523012
13. Pekkinen M, Saarnio E, Viljakainen HT, Kokkonen E, Jakobsen J, Cashman K, et al. Vitamin D binding protein genotype is associated with serum 25-hydroxyvitamin D and PTH concentrations, as well as bone health in children and adolescents in Finland. *PloS One.* 2014; 9:e87292. <https://doi.org/10.1371/journal.pone.0087292> PMID: 24498064
14. Powe CE, Evans MK, Wenger J, Zonderman AB, Berg AH, Nalls M, et al. Vitamin D-binding protein and vitamin D status of black Americans and white Americans. *N Engl J Med.* 2013; 369:1991–2000. <https://doi.org/10.1056/NEJMoa1306357> PMID: 24256378
15. Chun RF, Peercy BE, Orwoll ES, Nielson CM, Adams JS, Hewison M. Vitamin D and DBP: the free hormone hypothesis revisited. *J Steroid Biochem Mol Biol.* 2014; 144:132–137. <https://doi.org/10.1016/j.jsbmb.2013.09.012> PMID: 24095930
16. Powe CE, Ricciardi C, Berg AH, Erdenesanaa D, Collerone G, Ankers E, et al. Vitamin D-binding protein modifies the vitamin D-bone mineral density relationship. *J Bone Miner Res.* 2011; 26:1609–1616. <https://doi.org/10.1002/jbmr.387> PMID: 21416506
17. Bhan I, Powe CE, Berg AH, Ankers E, Wenger JB, Karumanchi SA, et al. Bioavailable vitamin D is more tightly linked to mineral metabolism than total vitamin D in incident hemodialysis patients. *Kidney Int.* 2012; 82:84–89. <https://doi.org/10.1038/ki.2012.19> PMID: 22398410
18. Aloia J, Mikhail M, Dhaliwal R, Shieh A, Usera G, Stolberg A, et al. Free 25(OH)D and the Vitamin D Paradox in African Americans. *J Clin Endocrinol Metab.* 2015; 100:3356–3363. <https://doi.org/10.1210/JC.2015-2066> PMID: 26161453
19. Walsh JS, Evans AL, Bowles S, Naylor KE, Jones KS, Schoenmakers I, et al. Free 25-hydroxyvitamin D is low in obesity, but there are no adverse associations with bone health. *Am J Clin Nutr.* 2016; 103:1465–1471. <https://doi.org/10.3945/ajcn.115.120139> PMID: 27169839
20. Wang J, Eliassen AH, Spiegelman D, Willett WC, Hankinson SE. Plasma free 25-hydroxyvitamin D, vitamin D binding protein, and risk of breast cancer in the Nurses' Health Study II. *Cancer Causes Control CCC.* 2014; 25:819–827. <https://doi.org/10.1007/s10552-014-0383-5> PMID: 24748579
21. Schwartz JB, Lai J, Lizaola B, Kane L, Markova S, Weyland P, et al. A comparison of measured and calculated free 25(OH) vitamin D levels in clinical populations. *J Clin Endocrinol Metab.* 2014; 99:1631–1637. <https://doi.org/10.1210/jc.2013-3874> PMID: 24483159
22. Lee MJ, Kearns MD, Smith EM, Hao L, Ziegler TR, Alvarez JA, et al. Free 25-Hydroxyvitamin D Concentrations in Cystic Fibrosis. *Am J Med Sci.* 2015; 350: 374–379. <https://doi.org/10.1097/MAJ.0000000000000592> PMID: 26512456
23. Carrascosa LA, Fernández GJM, Fernández RC, Ferrández LA, López-Siguero JP, Sánchez GE, et al. Spanish cross-sectional growth study 2008. Part II. Height, weight and body mass index values from birth to adulthood. *An Pediatr Barc.* 2008; 68:552–569. PMID: 18559194
24. Bikle D, Bouillon R, Thadhani R, Schoenmakers I. Vitamin D metabolites in captivity? Should we measure free or total 25(OH)D to assess vitamin D status? *J Steroid Biochem Mol Biol.* 2017; 173:105–116. <https://doi.org/10.1016/j.jsbmb.2017.01.007> PMID: 28093353
25. Braegger C, Campoy C, Colomb V, Decsi T, Domellof M, Fewtrell M, et al. Vitamin D in the healthy European paediatric population. *J Pediatr Gastroenterol Nutr.* 2013; 56:692–701. <https://doi.org/10.1097/MPG.0b013e31828f3c05> PMID: 23708639
26. Hollis BW. Circulating 25-hydroxyvitamin D levels indicative of vitamin D sufficiency: implications for establishing a new effective dietary intake recommendation for vitamin D. *J Nutr.* 2005; 135:317–322. <https://doi.org/10.1093/jn/135.2.317> PMID: 15671234
27. Alonso A, Rodríguez J, Carvajal I, Prieto MAL, Rodríguez RMA, Pérez AMA, et al. Prophylactic vitamin D in healthy infants: assessing the need. *Metabolism.* 2011; 60:1719–1725. <https://doi.org/10.1016/j.metabol.2011.04.011> PMID: 21663925
28. Greer FR. Defining vitamin D deficiency in children: beyond 25-OH vitamin D serum concentrations. *Pediatrics.* 2009; 124:1471–1473. <https://doi.org/10.1542/peds.2009-2307> PMID: 19858159
29. Fuleihan GE-H, Bouillon R, Clarke B, Chakhtoura M, Cooper C, McClung M, et al. Serum 25-Hydroxyvitamin D Levels: Variability, Knowledge Gaps, and the Concept of a Desirable Range. *J Bone Miner Res.* 2015; 30:1119–1133. <https://doi.org/10.1002/jbmr.2536> PMID: 25952470

30. Herrmann M, Farrell C-JL, Puseddu I, Fabregat-Cabello N, Cavalier E. Assessment of vitamin D status—a changing landscape. *Clin Chem Lab Med*. 2017; 55: 3–26. <https://doi.org/10.1515/cclm-2016-0264> PMID: 27362963
31. Bouillon R, Jones K, Schoenmakers I. Vitamin D-binding protein and vitamin D in blacks and whites. *N Engl J Med*. 2014; 370:879.
32. Hollis BW, Bikle DD. Vitamin D-binding protein and vitamin D in blacks and whites. *N Engl J Med*. 2014; 370: 879–880.
33. Nielson CM, Jones KS, Chun RF, Jacobs JM, Wang Y, Hewison M, et al. Free 25-Hydroxyvitamin D: Impact of Vitamin D Binding Protein Assays on Racial-Genotypic Associations. *J Clin Endocrinol Metab*. 2016; 101:2226–2234. <https://doi.org/10.1210/jc.2016-1104> PMID: 27007693
34. Jeng L, Yamshchikov AV, Judd SE, Blumberg HM, Martin GS, Ziegler TR, et al. Alterations in vitamin D status and anti-microbial peptide levels in patients in the intensive care unit with sepsis. *J Transl Med*. 2009; 7: 28. <https://doi.org/10.1186/1479-5876-7-28> PMID: 19389235
35. Hanson C, Lyden E, Nelson A, Thoene M, Wagner J, Wu A, et al. Response of vitamin D binding protein and free vitamin D concentrations to vitamin D supplementation in hospitalized premature infants. *J Pediatr Endocrinol Metab*. 2015; 28:1107–1114. <https://doi.org/10.1515/jpem-2015-0089> PMID: 26030788
36. Carbone LD, Rosenberg EW, Tolley EA, Holick MF, Hughes TA, Watsky MA, et al. 25-Hydroxyvitamin D, cholesterol, and ultraviolet irradiation. *Metabolism*. 2008; 57:741–748. <https://doi.org/10.1016/j.metabol.2008.01.011> PMID: 18502255
37. Gordon CM, Feldman HA, Sinclair L, Williams AL, Kleinman PK, Perez-Rossello J, et al. Prevalence of vitamin D deficiency among healthy infants and toddlers. *Arch Pediatr Adolesc Med*. 2008; 162:505–512. <https://doi.org/10.1001/archpedi.162.6.505> PMID: 18524739
38. Ashwell M, Stone EM, Stolte H, Cashman KD, Macdonald H, Lanham-New S, et al. UK Food Standards Agency Workshop Report: an investigation of the relative contributions of diet and sunlight to vitamin D status. *Br J Nutr*. 2010; 104: 603–611. <https://doi.org/10.1017/S0007114510002138> PMID: 20522274
39. Shaw NJ, Mughal MZ. Vitamin D and child health part 1 (skeletal aspects). *Arch Dis Child*. 2013; 98: 363–367. <https://doi.org/10.1136/archdischild-2011-301264> PMID: 23287642
40. Alonso MA, Pallavicini ZF, Rodríguez J, Avello N, Martínez-Cambor P, Santos F. Can vitamin D status be assessed by serum 25OHD in children? *Pediatr Nephrol*. 2015; 30:327–332. <https://doi.org/10.1007/s00467-014-2927-z> PMID: 25135619
41. Almeida ACF, de Paula FJA, Monteiro JP, Nogueira-de-Almeida CA, Del Ciampo LA, Aragon DC, et al. Do all infants need vitamin D supplementation? *PloS One*. 2018; 13: e0195368. <https://doi.org/10.1371/journal.pone.0195368> PMID: 29649273
42. Kroll MH, Bi C, Garber CC, Kaufman HW, Liu D, Caston-Balderrama A, et al. Temporal relationship between vitamin D status and parathyroid hormone in the United States. *PloS One*. 2015; 10: e0118108. <https://doi.org/10.1371/journal.pone.0118108> PMID: 25738588
